# Supplementary material for: Effects of Electrolytes on the Dediazoniation of Aryldiazonium Ions in Acidic MeOH/H2O Mixtures
Source: MDPI journal article supplement (doi:10.3390/compounds2010005), 2022-02-15
Supplement: s1 [file s1]

Article

# Effects of Electrolytes on the Dediazonation of Aryldiazonium Ions in Acidic MeOH/H<sub>2</sub>O Mixtures

Sonia Losada-Barreiro and Carlos Bravo-Díaz \*

Department of Química-Física, Universidad de Vigo, Rua Abelleiras s/n, 36310 Vigo, Spain; sonia@uvigo.es

\* Correspondence: cbravo@uvigo.es

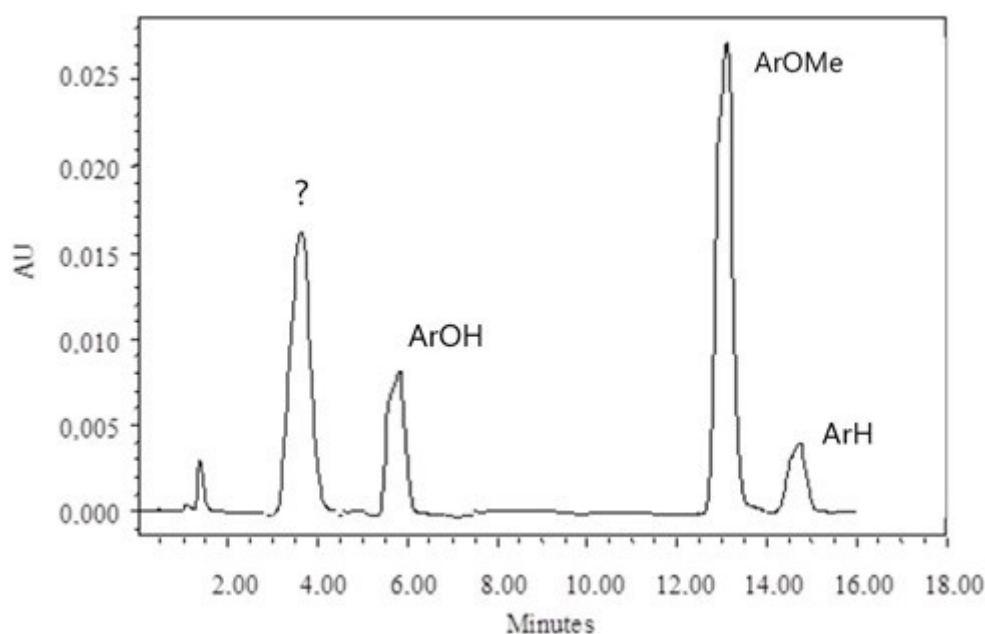

**Figure S1.** The chromatogram in Figure 1.
